# Supplementary material for: The SAM domain of mouse SAMHD1 is critical for its activation and regulation
Source: PubMed Central journal article supplement (PMC5788916; doi:10.1038/s41467-017-02783-8), 2018-01-29
Supplement: 41467_2017_2783_MOESM1_ESM.pdf [file 41467_2017_2783_MOESM1_ESM.pdf]

## Supplementary Figure 1

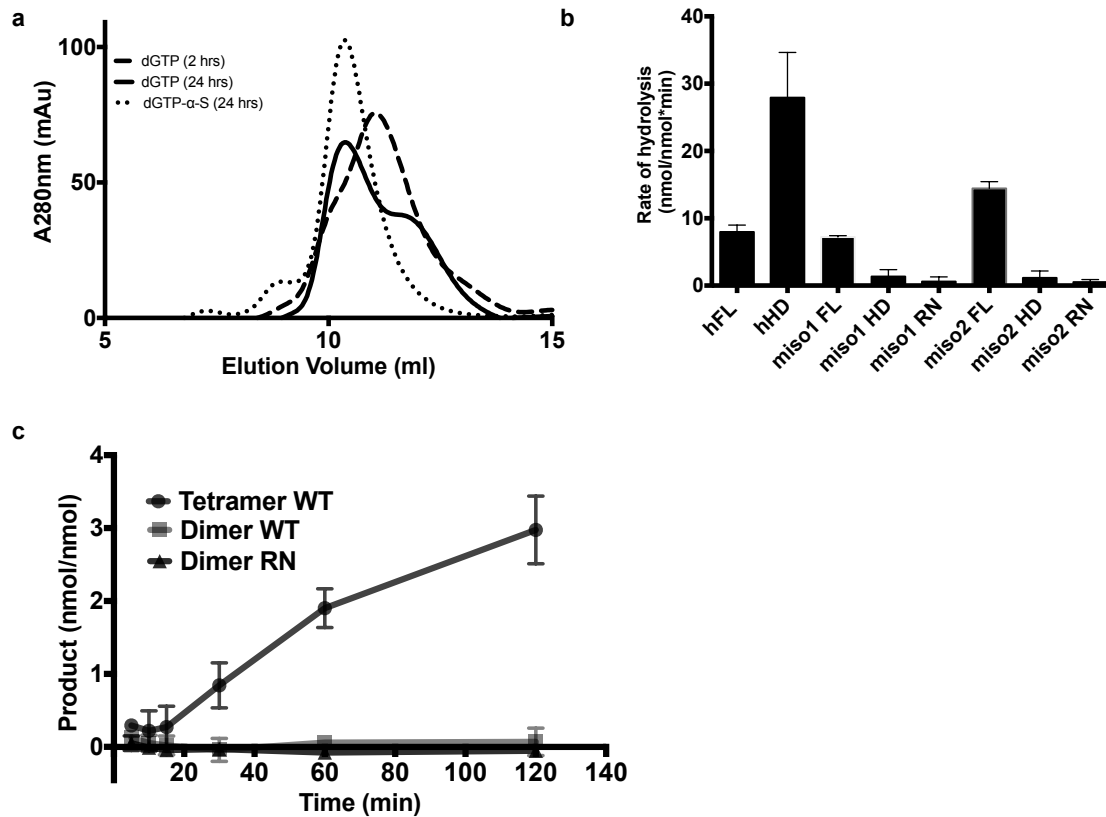

**Supplementary Figure 1. mSAMHD1 tetramerization and activity.** (a) SEC analysis of purified full-length mSAMHD1 iso1 RN mutant incubated with dGTP or dGTP- $\alpha$ -S for 2 or 24 hours. (b) dNTPase assay for full-length (FL), HD, and RN constructs of hSAMHD1 and mSAMHD1. Reaction products were quantified by the malachite green assay. Each experiment was performed in triplicate. Error bars, s.d. (c) dNTPase activity assay for mSAMHD1 iso2 dimer or tetramer formed during purification, without additional allosteric nucleotides added to the reaction mixtures. Tetramers formed in the absence of additional allosteric nucleotides have very low activity requiring incubation times of 2 hours. Reaction products were quantified by the malachite green assay. Each experiment was performed in triplicate. Error bars, s.d.

## Supplementary Figure 2

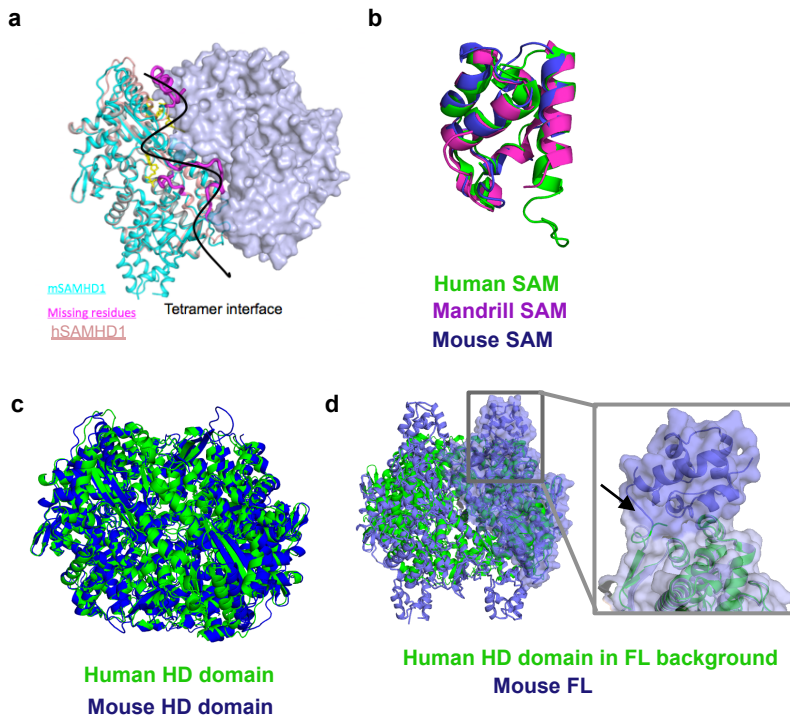

**Supplementary Figure 2. mSAMHD1 is structurally similar to hSAMHD1.** (a) Structural alignment of the mSAMHD1 structure (cyan and purple surface) to the hSAMHD1 structure PDB ID 4BZB (pink), with unobserved mSAMHD1 residues highlighted with magenta tubes. (b) Structural alignment of the SAM domain from the current full-length mSAMHD1 structure (blue), the crystal structure of human SAM domain (PDBID 2E8O) (green), and the NMR structure of the mandrill SAM domain (PDBID 5AJA) (magenta). (c) Structural alignment of the HD domains from the current full-length mSAMHD1 structure and the full-length hSAMHD1 structure (PDBID 5AO0) (green) in which the SAM was not observed. (d) Structural alignment of the full-length hSAMHD1 structure (SAM unobserved) (green) (PDBID 5AO0) and the current full-length mSAMHD1 structure (purple). Arrow indicates the largest difference between the structures at the HD-SAM interface.

# Supplementary Figure 3

**a**

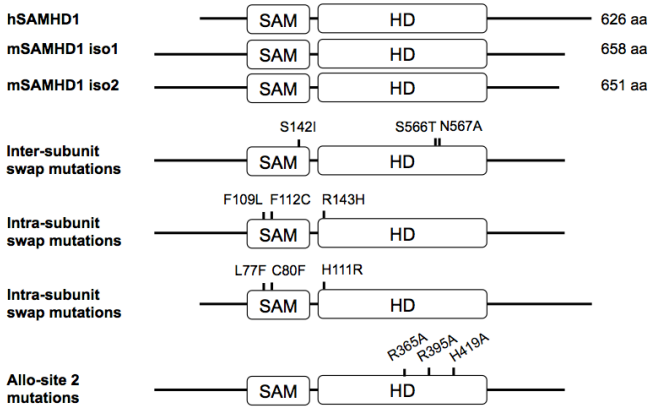

**b**

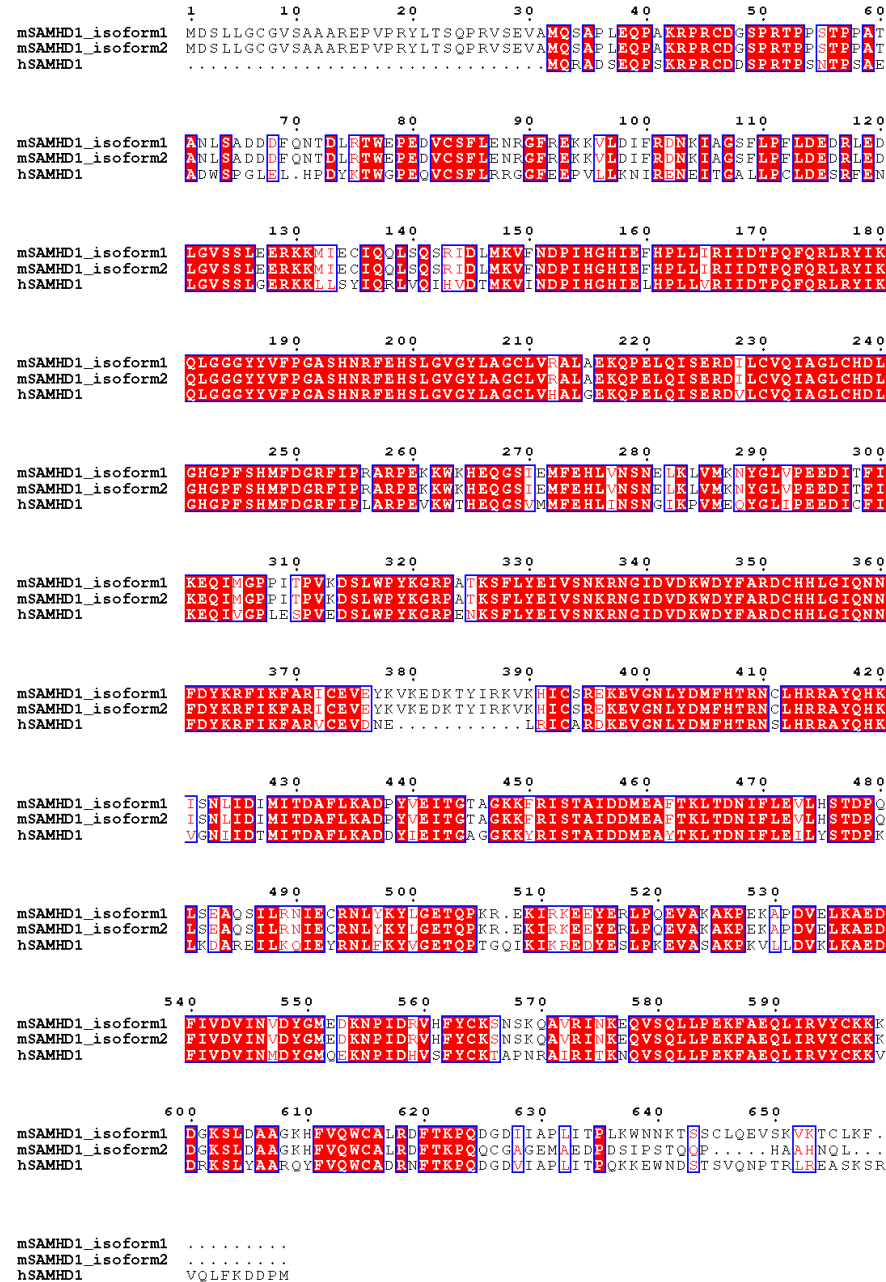

**Supplementary Figure 3. Human and mouse SAMHD1 proteins are similar in sequence. (a)** Schematic of SAMHD1 proteins and mutants. **(b)** Sequence alignment of hSAMHD1, mSAMHD1 iso1, and mSAMHD1 iso2. Created with ESPrnt (<http://esprnt.ibcp.fr>).

## Supplementary Figure 4

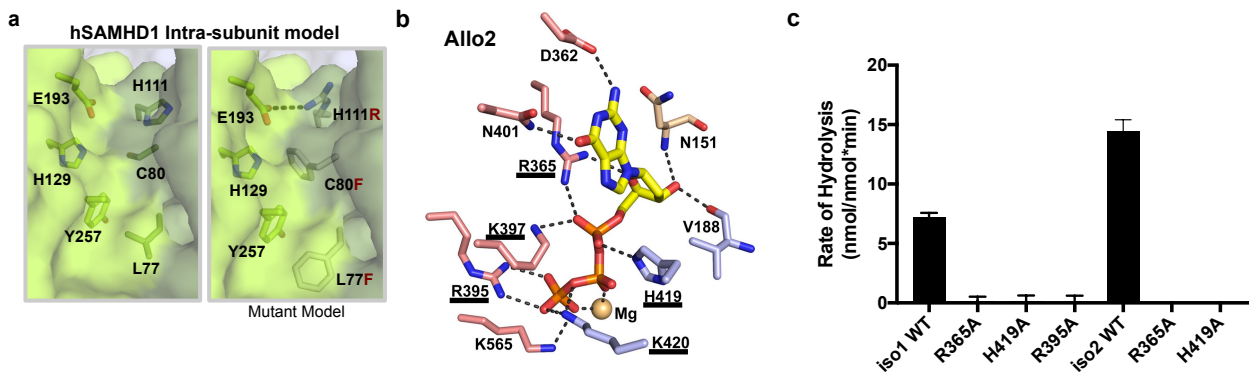

**Supplementary Figure 4. Nucleotides binding at allosteric site 2 is important for mSAMHD1 activity.** (a) Left, model of hSAMHD1 SAM-to-HD intra-subunit interface based on the 2-Allo mSAMHD1 structure. Right, model of SAM-to-HD interface after hSAMHD1 residues are mutated to the corresponding mSAMHD1 residues. (b) Residues interacting with the dNTP at Allo-site 2. (c) dNTPase activity assay for WT and mutants of mSAMHD1 iso1. Reaction products were quantified by the malachite green assay. Each experiment was performed in triplicate. Error bars, s.d.

## Supplementary Figure 5

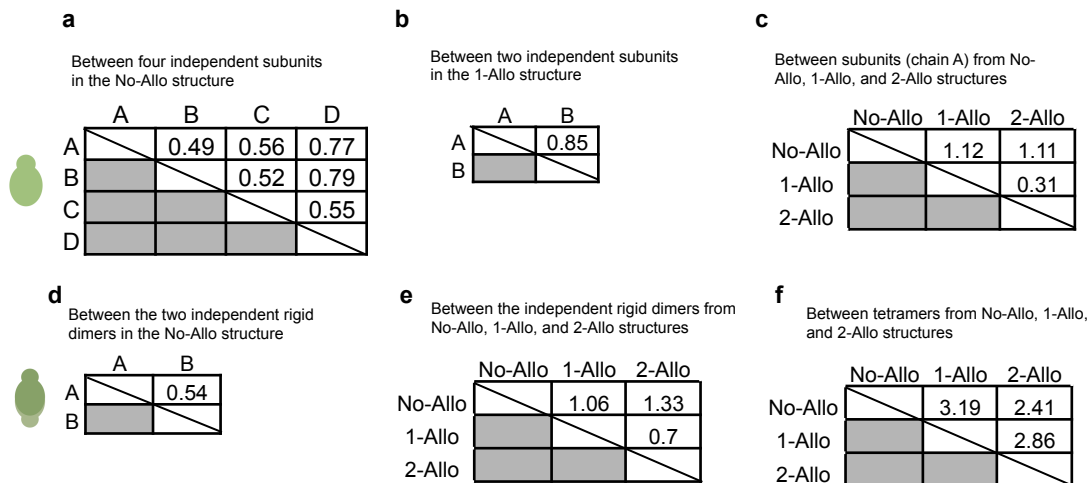

**Supplementary Figure 5. Structural comparisons of the components of mSAMHD1 tetramers in the three activation states.** (a) RMSD values from pairwise alignments of the monomers within the No-Allo structure. (b) RMSD from alignment of the monomers within the 1-Allo structure. (c) RMSD values from pairwise alignments of the monomers between the No-Allo, 1-Allo, and 2-Allo structures. (d) RMSD from alignment of the two independent rigid dimers within the No-Allo structure. (e) RMSD values from pairwise alignments of mSAMHD1 rigid dimers between the No-Allo, 1-Allo, and 2-Allo structures. (f) RMSD values from pairwise alignments of mSAMHD1 tetramers between the No-Allo, 1-Allo, and 2-Allo structures.

## Supplementary Figure 6

a

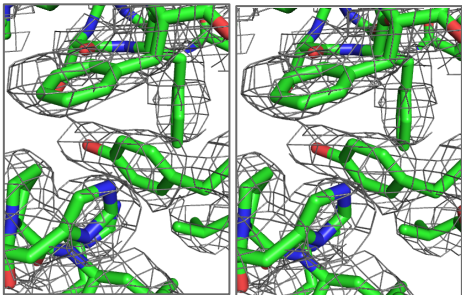

b

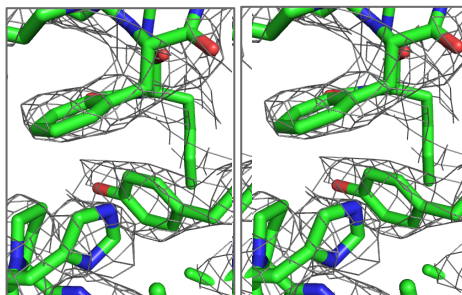

c

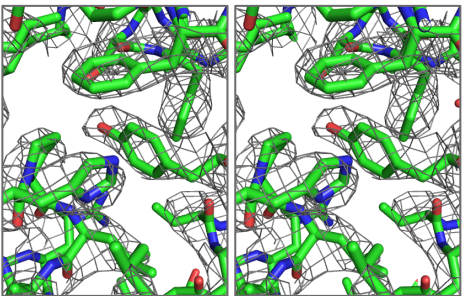

**Supplementary Figure 6. Stereo images of electron density.** Stereo images of a portion of (a) No-Allo crystal structure and (b) 1-Allo crystal structure and (c) 2-Allo crystal structure. The 2Fo-Fc electron density maps countoured at  $1\sigma$  shown as black mesh.

## Supplementary Figure 7

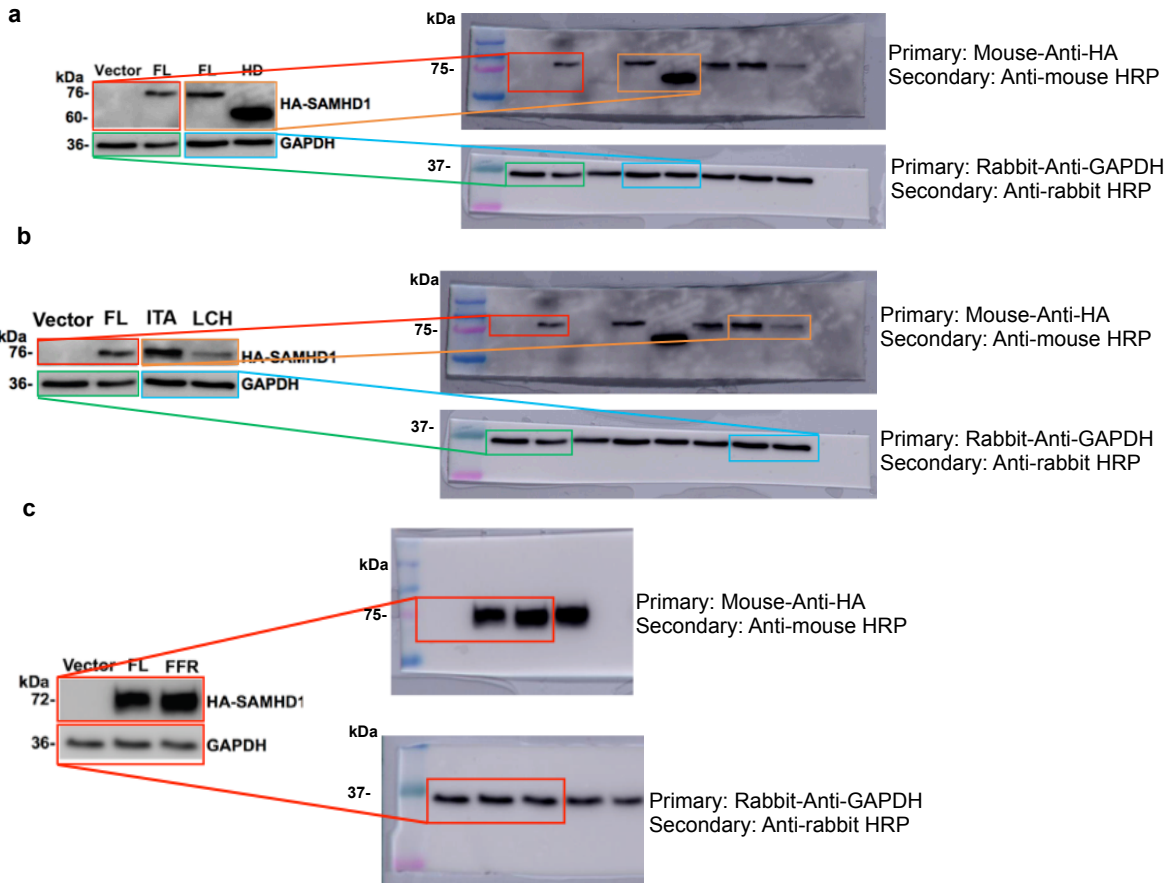

**Supplementary Figure 7. Uncropped immunoblots.** (a) Immunoblots corresponding to figure 1i. (b) Immunoblots corresponding to figure 3c. (c) Immunoblots corresponding to figure 3f.

**Supplementary Table 1: Primers used in the study**

| Clone           | Primers                                                                                                                                                                                                        |
|-----------------|----------------------------------------------------------------------------------------------------------------------------------------------------------------------------------------------------------------|
| hSAMHD1 FL      | Forward: GT ggatcc atgcagcgagccgattccgagcagccc<br><br>Reverse: CTT ACC GGT TCA AGC ATA ATC TGG AAC<br>ATC ATA TGG ATA CAT TGG GTC ATC TTT AAA AAG<br>CTG GAC TCT GCT TTT GGA TGC                               |
| mSAMHD1 iso1 FL | Forward: GT ggatcc atggactcacttttgggggtgtggtgtc<br><br>Reverse: CTT ACC GGT TCA AGC ATA ATC TGG AAC<br>ATC ATA TGG ATA AAA TTT TAG ACA TGT TTT TAC<br>TTT GGA TAC TTC TTG GAG GC                               |
| mSAMHD1 iso2 FL | Forward: GT ggatcc atggactcacttttgggggtgtggtgtc<br><br>Reverse: CTT ACC GGT TCA AGC ATA ATC TGG AAC<br>ATC ATA TGG ATA CAG CTG GTT GTG AGC CGC ATG<br>TGG CTG CTG                                              |
| mSAMHD1 iso1 HD | Forward: GT ggatcc atg GAT CTA ATG AAG GTA TTT<br>AAT GAT CCC ATT CAT GGC CAC<br><br>Reverse: CTT ACC GGT TCA AGC ATA ATC TGG AAC<br>ATC ATA TGG ATA AAA TTT TAG ACA TGT TTT TAC<br>TTT GGA TAC TTC TTG GAG GC |
| mSAMHD1 iso2 HD | Forward: GT ggatcc atg GAT CTA ATG AAG GTA TTT<br>AAT GAT CCC ATT CAT GGC CAC<br><br>Reverse: CTT ACC GGT TCA AGC ATA ATC TGG AAC<br>ATC ATA TGG ATA CAG CTG GTT GTG AGC CGC ATG<br>TGG CTG CTG                |
| hSAMHD1 HD      | Forward: GT GAATTCacaatgaaggt aattaatgat<br><br>Reverse: CTT ACC GGT TCA AGC ATA ATC TGG AAC<br>ATC ATA TGG ATA CAT TGG GTC ATC TTT AAA AAG<br>CTG GAC TCT GCT TTT GGA TGC                                     |
| mSAMHD1 RN      | Forward:<br>ctgtgttcagattgcggggctctgccggaacctaggtcatgggccattttctcatatg<br>Reverse:<br>catatgagaaaatggcccatgacctaggtcggcagagccccgcaatctgaacacag                                                                 |
| hSAMHD1 RN      | Forward:<br><b>gttcagattgctggactttgtCGTAATctcgggtcatgggccattttc</b><br>Reverse: gaaaatggcccatgacctaggtcggcagagccccgcaatctgaac                                                                                  |



**Supplementary Table 1 continued**

|                            |                                                                                                                                                                                                                                                                                                                                                                                                                                                    |
|----------------------------|----------------------------------------------------------------------------------------------------------------------------------------------------------------------------------------------------------------------------------------------------------------------------------------------------------------------------------------------------------------------------------------------------------------------------------------------------|
| mSAMHD1 ITA mutant         | <p>S142I Forward: GAA TGT ATC CAG CAG CTG AGT CAG att CGG ATT GAT CTA ATG AAG GTA TTT AAT GAT CCC</p> <p>S142I Reverse: GGG ATC ATT AAA TAC CTT CAT TAG ATC AAT CCG AAT CTG ACT CAG CTG CTG GAT ACA TTC</p> <p>SN566-567TA Forward: CGA TCG TGT TCA CTT CTA TTG TAA G acc gcc AGC AAG CAA GCG GTC AGG ATC</p> <p>SN566-567TA Reverse: GAT CCT GAC CGC TTG CTT GCT GGC GGT CTT ACA ATA GAA GTG AAC ACG ATC G</p>                                    |
| hSAMHD1 LCH to FFR mutant  | <p>L77F,C80F Forward: CCG AGA AAA TGA AAT CAC AGG CGC A TTT ctgcct TTT cttgatgagtctcgttttgaatcttg</p> <p>L77F,C80F Reverse: CAA GAT TTT CAA AAC GAG ACT CAT CAA GAA AAG GCA GAA ATG CGC CTG TGA TTT CAT TTT CTC GG</p> <p>H111R Forward: CTT AGT TAT ATC CAG CGA TTG GTT CAA ATC cgc GTT GAT ACA ATG AAG GTA ATT AAT GAT CCT ATC</p> <p>H111R Reverse: GAT AGG ATC ATT AAT TAC CTT CAT TGT ATC AAC GCG GAT TTG AAC CAA TCG CTG GAT ATA ACT AAG</p> |
| mSAMHD1 FFR to LCH mutant  | <p>FF109,112LC Forward: gagacaataaaatcgccggctcg CTG ctgecc tgt TTG GAT GAG GAT CGT CTG GAA GAT CTG</p> <p>FF109,112LC Reverse: AG ATC TTC CAG ACG ATC CTC ATC CAA ACA GGG CAG CAG CGA GCC GGC GAT TTT ATT GTC TC</p> <p>R143H Forward: GTA TCC AGC AGC TGA GTC AGT CT cac attgatctaataaggtatttaataatgatccc</p> <p>R143H Reverse: GGG ATC ATT AAA TAC CTT CAT TAG ATC AAT GTG AGA CTG ACT CAG CTG CTG GAT AC</p>                                    |
| mSAMHD1 R365A mutant       | <p>R365A Forward: CTT GGA ATC CAA AAT AAT TTT GAT TAC AAG gcc TTC ATT AAG TTT GCC CGT ATC TGT G</p> <p>R365A Reverse: CAC AGA TAC GGG CAA ACT TAA TGA AGG CCT TGT AAT CAA AAT TAT TTT GGA TTC CAA G</p>                                                                                                                                                                                                                                            |
| mSAMHD1 H419A H420A mutant | <p>H419K420A Forward: CTT ACA CCG AAG AGC TTA CCA A gccgcg ATC AGC AAC CTC ATC GAC ATA</p>                                                                                                                                                                                                                                                                                                                                                         |

|                      |                                                                                                                                                                                                              |
|----------------------|--------------------------------------------------------------------------------------------------------------------------------------------------------------------------------------------------------------|
|                      | ATG<br>H419K420A Reverse: CAT TAT GTC GAT GAG GTT<br>GCT GAT CGC GGC TTG GTA AGC TCT TCG GTG<br>TAA G                                                                                                        |
| mSAMHD1 R395A mutant | R395K397A Forward: GTA AGG TGA AGC ACA TTT<br>GTT CG gcagaagcg GAG GTT GGA AAT CTG TAT<br>GAC ATG<br><br>R395K397A Reverse: CAT GTC ATA CAG ATT TCC<br>AAC CTC CGC TTC TGC CGA ACA AAT GTG CTT<br>CAC CTT AC |
